# Supplementary material
Source: MDPI journal article supplement (https://www.mdpi.com/1424-2818/15/12/1189)
Supplement: s1 [file s1]

## SUPPLEMENTARY FILE

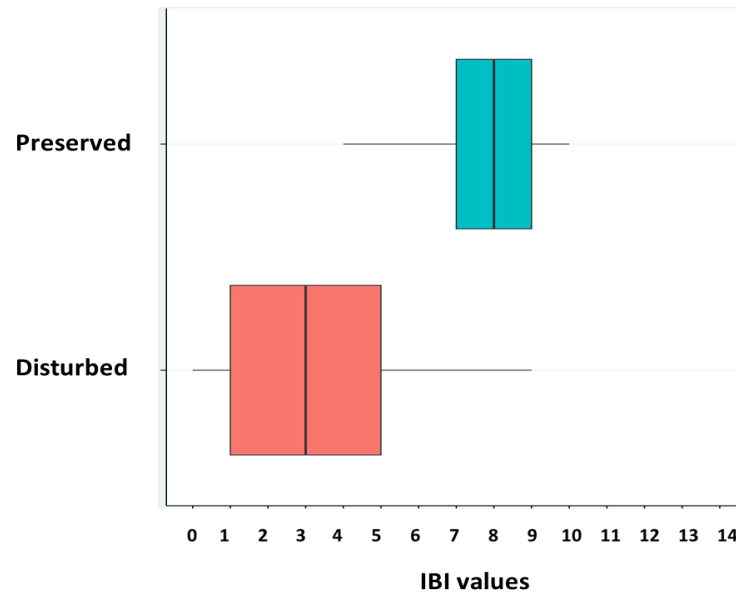

**Figure S1.** Boxplots of total IBI values all preserved sites and disturbed sites. IBI values are significantly higher in preserved sites with low variance compared to disturbed sites. Letters indicate significant difference according to Wilcoxon test ( $U=3279.5$ ,  $P<0.0001$ ).

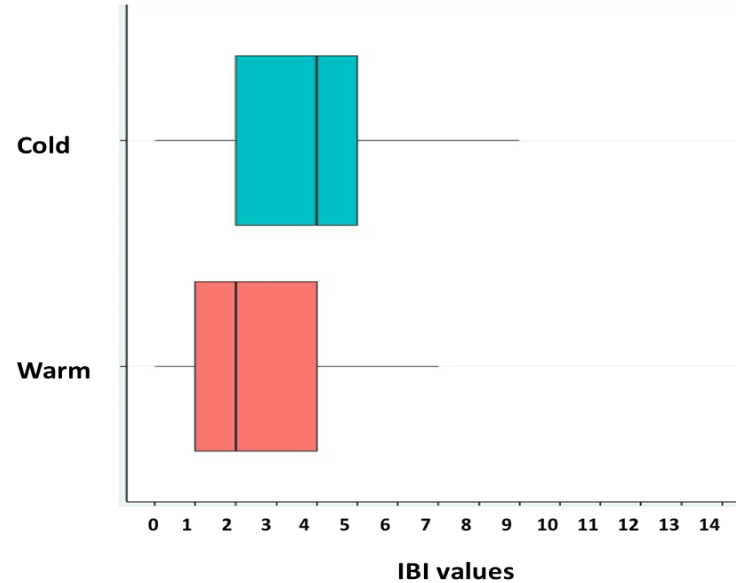

**Figure S2.** Boxplots of total IBI values of the six sites representing disturbed native forest per semester Cold semester - Winter/Spring ( $n=37$ ), Warm semester- Summer/Autumn ( $n=44$ ), Same letter indicates non-significant differences according to Wilcoxon test ( $U=980$ ,  $P=1$ ).

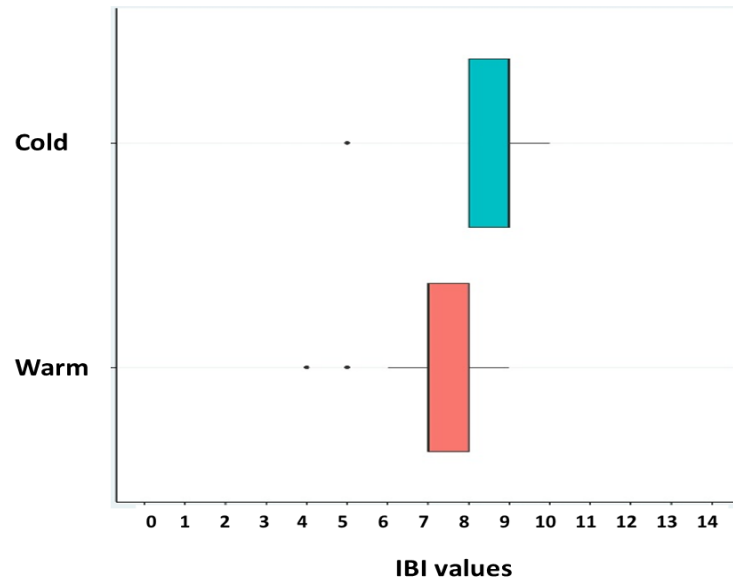

**Figure S3.** Boxplots of total IBI values of the six sites representing preserved native forest per semester Cold semester - Winter/Spring (n= 40), Warm semester - Summer/Autumn (n= 47), Same letter indicates non-significant differences according to Wilcoxon test (U=1591,  $P<0.0001$ ).

**Table S1.** Number of seasons data available in disturbed and preserved reference sites.

| Islands  | Site quality | Winter | Spring | Summer | Autumn |
|----------|--------------|--------|--------|--------|--------|
| Flores   | Disturbed    | 5      | 6      | 7      | 5      |
| Flores   | Disturbed    | 1      | 2      | 3      | 2      |
| Pico     | Disturbed    | 8      | 8      | 8      | 8      |
| Pico     | Disturbed    | 1      | 2      | 3      | 3      |
| Terceira | Disturbed    | 8      | 9      | 9      | 8      |
| Terceira | Disturbed    | 6      | 8      | 11     | 9      |
| Flores   | Preserved    | 1      | 2      | 3      | 2      |
| Pico     | Preserved    | 1      | 2      | 3      | 3      |
| Terceira | Preserved    | 9      | 9      | 11     | 11     |
| Terceira | Preserved    | 6      | 6      | 8      | 8      |
| Terceira | Preserved    | 9      | 9      | 11     | 11     |
| Terceira | Preserved    | 5      | 6      | 8      | 7      |

**Table S2.** Number of semesters data available in disturbed and preserved reference sites. Seasons winter and spring are merged into Cold semester. Seasons summer and autumn are merged into warm semester.

| Islands  | Site quality | Cold<br>(Winter/Spring) | Warm<br>(Summer/Autumn) |
|----------|--------------|-------------------------|-------------------------|
| Flores   | Disturbed    | 6                       | 8                       |
| Flores   | Disturbed    | 2                       | 3                       |
| Pico     | Disturbed    | 8                       | 9                       |
| Pico     | Disturbed    | 2                       | 3                       |
| Terceira | Disturbed    | 9                       | 10                      |
| Terceira | Disturbed    | 10                      | 11                      |
| Flores   | Preserved    | 2                       | 3                       |
| Pico     | Preserved    | 2                       | 3                       |
| Terceira | Preserved    | 10                      | 11                      |
| Terceira | Preserved    | 9                       | 10                      |
| Terceira | Preserved    | 10                      | 11                      |
| Terceira | Preserved    | 7                       | 9                       |

**Table S3.** Mean and range values of biointegrity index in disturbed and preserved reference sites for the four seasons. *H* and *P* are respectively the statistic and Probability values of the Kruskal-Wallis test comparing the four seasons. – Indicates situations where data are insufficient to run a Kruskal-Wallis test.

| Islands             | Site quality | Winter     |          | Spring      |          | Summer     |         | Autumn      |         | H     | P       |
|---------------------|--------------|------------|----------|-------------|----------|------------|---------|-------------|---------|-------|---------|
|                     |              | Mean±SD    | Range    | Mean±SD     | Range    | Mean±SD    | Range   | Mean±SD     | Range   |       |         |
| Flores              | Disturbed    | 3.0 ± 1.58 | [1 - 5]  | 5.7 ± 0.52  | [5 - 6]  | 3.9 ± 0.69 | [3 - 5] | 4.0 ± 1.58  | [2 - 6] | 5.18  | 0.394   |
| Flores              | Disturbed    | --         | --       | 5 ± 0       | [5 - 5]  | 3.3 ± 1.16 | [2 - 4] | 4.0 ± 1.41  | [3 - 5] | --    | --      |
| Pico                | Disturbed    | 0.9 ±1.46  | [0 - 4]  | 2.13 ± 1.96 | [0 - 5]  | 1.0 ± 0.93 | [0 - 2] | 1.1 ± 1.73  | [0 - 5] | 2.61  | 0.760   |
| Pico                | Disturbed    | --         | --       | 9.0 ± 0.00  | [9 - 9]  | 7.7 ± 0.58 | [7 - 8] | 7.7 ± 0.58  | [7 - 8] | --    | --      |
| Terceira            | Disturbed    | 3.3 ± 2.66 | [0 - 8]  | 2.3 ± 1.23  | [0 - 4]  | 2.1 ± 1.27 | [1 - 4] | 1.25 ± 0.71 | [0 - 2] | 5.83  | 0.442   |
| Terceira            | Disturbed    | 5.7 ± 1.37 | [3 - 7]  | 6.3 ± 1.49  | [4 - 8]  | 4.4 ± 1.50 | [2 - 7] | 4.1 ± 2.37  | [0 - 7] | 6.80  | 0.558   |
| Flores              | Preserved    | --         | --       | 8.5 ± 0.71  | [8 - 9]  | 7.0 ± 0.00 | [7 - 7] | 6.5 ± 2.12  | [5 - 8] | --    | --      |
| Pico                | Preserved    | --         | --       | 7.0 ± 2.83  | [5 - 9]  | 8.3 ± 0.58 | [8 - 9] | 8.7 ± 0.58  | [8 - 9] | --    | --      |
| Terceira            | Preserved    | 8.1 ± 0.60 | [7 - 9]  | 8.3 ± 0.71  | [7 - 9]  | 7.1 ± 1.04 | [5 - 8] | 6.6 ± 0.92  | [5 - 8] | 6.71  | 0.152   |
| Terceira            | Preserved    | 9.0 ± 1.10 | [7 - 10] | 9.5 ± 0.55  | [9 - 10] | 8.6 ± 0.52 | [8 - 9] | 7.5 ± 1.31  | [5 - 9] | 4.45  | 0.349   |
| Terceira            | Preserved    | 8.4 ± 0.53 | [8 - 9]  | 8.4 ± 0.53  | [8 - 9]  | 6.6 ± 0.81 | [5 - 8] | 7.3 ± 0.79  | [6 - 8] | 2.93  | 0.569   |
| Terceira            | Preserved    | 8.2 ± 0.45 | [8 - 9]  | 8.3 ± 1.03  | [7 - 10] | 7.5 ± 0.93 | [6 - 9] | 6.29 ± 1.11 | [5 - 8] | 8.06  | 0.153   |
| All Disturbed sites |              | 3.2 ± 2.6  | [0 - 8]  | 4.3 ± 2.5   | [0 - 9]  | 3.3 ± 2.1  | [0 - 8] | 3.1 ± 2.5   | [0 - 8] | 5.48  | 0.14    |
| All Preserved sites |              | 8.4 ± 0.8  | [7 - 10] | 8.5 ± 1.0   | [5 - 10] | 7.4 ± 1.0  | [5 - 9] | 7.0 ± 1.2   | [5 - 9] | 42.97 | P<0.001 |
| Total               |              | 5.9 ± 3.2  | [0 - 10] | 6.4 ± 2.8   | [0 - 10] | 5.4 ± 2.6  | [0 - 9] | 5.2 ± 2.7   | [0 - 9] | 11.2  | 0.011   |
